# Supplementary material for: Synthesis, In Silico, In Vivo, and Ex Vivo Evaluation of a Boron-Containing Quinolinate Derivative with Presumptive Action on mGluRs
Source: MDPI journal article supplement (doi:10.3390/inorganics11030094), 2023-02-26
Supplement: s1 [file s1]

## Supplementary Material

### Synthesis, In Silico, In Vivo, and Ex Vivo Evaluation of a Boron-Containing Quinolate Derivative with Presumptive Action on mGluR

Mario Emilio Cuevas-Galindo, Brenda Anaid Rubio-Velázquez, Rosa Adriana Jarillo-Luna, Itzia I. Padilla-Martínez, Marvin A. Soriano-Ursúa and José G. Trujillo-Ferrara

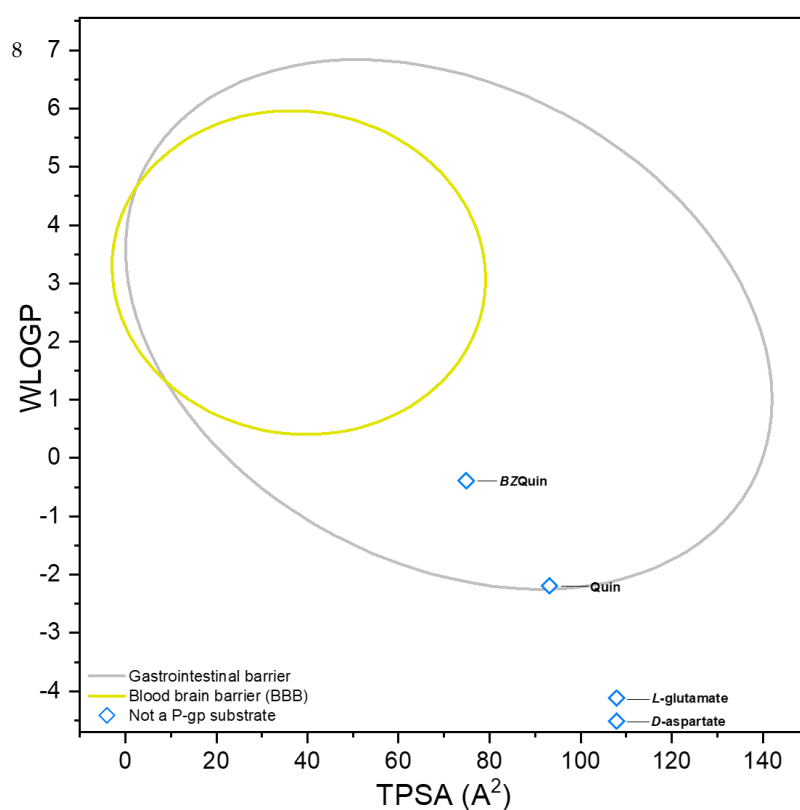

**Figure S1.** BOILED-Egg graph for BZQuin, Quin, L-glutamate, and D-aspartate. The chemical structures were evaluated while considering the protonation/deprotonation of their groups at physiological pH (7.4).

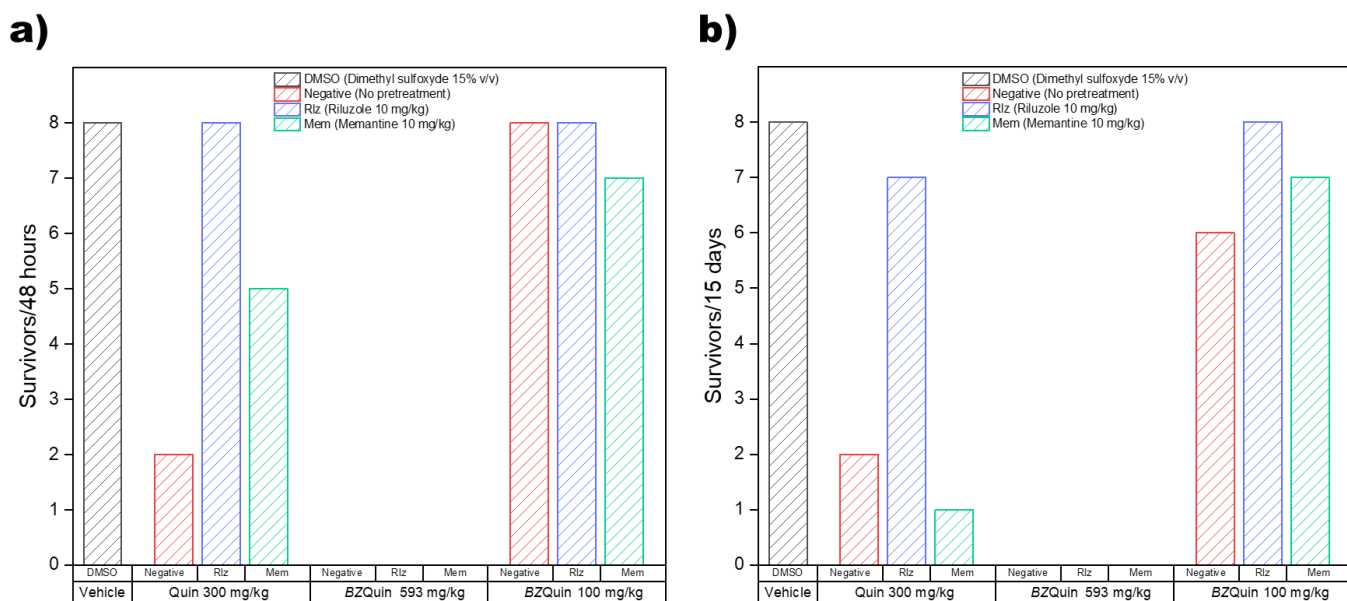

**Figure S2.** Mice survival at a) 48 hours and b) 15 days after the OFT.

**Table S1.** Predicted cytochrome inhibition and Lipinski's Rule of Five for *BZQuin*, *Quin*, *L*-glutamate, and *D*-aspartate. The chemical structures were evaluated while considering the protonation/deprotonation of their groups at physiological pH (7.4).

| Metabolism              |                  |                  |                       |                   |
|-------------------------|------------------|------------------|-----------------------|-------------------|
| Molecule                | CYP1A2 inhibitor | CYP2C9 inhibitor | CYP2D6 inhibitor      | CYP3A4 inhibitor  |
| <i>BZQuin</i>           | No               | No               | No                    | No                |
| <i>Quin</i>             | No               | No               | No                    | No                |
| <i>L</i> -glutamate     | No               | No               | No                    | No                |
| <i>D</i> -aspartate     | No               | No               | No                    | No                |
| Lipinski's Rule of Five |                  |                  |                       |                   |
| Molecule                | MW ≤ 500 g/mol   | MLOGP ≤ 4.15     | H-bond acceptors ≤ 10 | H-bond donors ≤ 5 |
| <i>BZQuin</i>           | 330.12           | 2.46             | 4                     | 0                 |
| <i>Quin</i>             | 165.1            | -1.47            | 5                     | 0                 |
| <i>L</i> -glutamate     | 146.12           | -4.64            | 4                     | 1                 |
| <i>D</i> -aspartate     | 132.09           | -5.05            | 4                     | 1                 |

**Table S2.** Gibbs energies and binding probabilities of *BZQuin*, *Quin*, *L*-glutamate, and *D*-aspartate on two isoforms of the NMDA receptor (synaptic and extrasynaptic), two group I mGluRs (mGluR1 & mGluR5), two group II mGluRs (mGluR2 & mGluR3), and two group III (mGluR7 & mGluR8). The chemical structures were evaluated while considering the protonation/deprotonation of their groups at physiological pH (7.4).

| Molecule            | NMDA receptor                        |             |                                         |             |                                      |             |                                      |             |
|---------------------|--------------------------------------|-------------|-----------------------------------------|-------------|--------------------------------------|-------------|--------------------------------------|-------------|
|                     | Synaptic (GluN1/GluN2A)              |             |                                         |             | Extrasynaptic (GluN1/GluN2B)         |             |                                      |             |
|                     | <i>L</i> -glutamate site (PDB: 5H8N) |             | 2A-selective NAMs/PAMs site (PDB: 5H8N) |             | <i>L</i> -glutamate site (PDB: 4PE5) |             | Ifenprodil site (PDB: 4PE5)          |             |
|                     |                                      |             |                                         |             |                                      |             |                                      |             |
|                     | $\Delta G$ (kcal/mol)                | Probability | $\Delta G$ (kcal/mol)                   | Probability | $\Delta G$ (kcal/mol)                | Probability | $\Delta G$ (kcal/mol)                | Probability |
| <i>BZQuin</i>       | 0                                    | 0           | 0                                       | 0           | 0                                    | 0           | 0                                    | 0           |
| Quin                | -6.786                               | 0.082       | 0                                       | 0           | -6.300                               | 0.003       | -6.600                               | 0.001       |
| <i>L</i> -glutamate | -6.506                               | 0.081       | 0                                       | 0           | -5.700                               | 0.003       | -6.018                               | 0.134       |
| <i>D</i> -aspartate | -5.633                               | 0.006       | 0                                       | 0           | -5.980                               | 0.148       | -5.482                               | 0.039       |
| Molecule            | mGluRs Group I                       |             |                                         |             |                                      |             |                                      |             |
|                     | mGluR1                               |             |                                         |             | mGluR5                               |             |                                      |             |
|                     | <i>L</i> -glutamate site (PDB: 3KS9) |             | NAMs site (PDB: 4OR2)                   |             | <i>L</i> -glutamate site (PDB: 3LMK) |             | NAMs site (PDB: 6FFH)                |             |
|                     |                                      |             |                                         |             |                                      |             |                                      |             |
|                     | $\Delta G$ (kcal/mol)                | Probability | $\Delta G$ (kcal/mol)                   | Probability | $\Delta G$ (kcal/mol)                | Probability | $\Delta G$ (kcal/mol)                | Probability |
| <i>BZQuin</i>       | -8.667                               | 1.000       | 0                                       | 0           | 0                                    | 0           | 0                                    | 0           |
| Quin                | -6.000                               | 1.000       | -6.699                                  | 0.982       | 0                                    | 0           | 0                                    | 0           |
| <i>L</i> -glutamate | -5.766                               | 0.943       | -6.041                                  | 0.935       | -6.598                               | 0.084       | -6.025                               | 0.520       |
| <i>D</i> -aspartate | -4.900                               | 0.866       | -5.378                                  | 0.952       | -5.700                               | 0.120       | -5.839                               | 0.753       |
| Molecule            | mGluRs Group II                      |             |                                         |             | mGluRs Group III                     |             |                                      |             |
|                     | mGluR2                               |             | mGluR3                                  |             | mGluR7                               |             | mGluR8                               |             |
|                     | <i>L</i> -glutamate site (PDB: 5CNJ) |             | <i>L</i> -glutamate site (PDB: 5CNK)    |             | <i>L</i> -glutamate site (PDB: 3MQ4) |             | <i>L</i> -glutamate site (PDB: 6BT5) |             |
|                     |                                      |             |                                         |             |                                      |             |                                      |             |
|                     | $\Delta G$ (kcal/mol)                | Probability | $\Delta G$ (kcal/mol)                   | Probability | $\Delta G$ (kcal/mol)                | Probability | $\Delta G$ (kcal/mol)                | Probability |
| <i>BZQuin</i>       | -10.490                              | 0.380       | 0                                       | 0           | -8.264                               | 1.000       | 0                                    | 0           |
| Quin                | -6.800                               | 1.000       | -7.594                                  | 0.895       | 0                                    | 0           | 0                                    | 0           |
| <i>L</i> -glutamate | -6.690                               | 0.999       | -7.149                                  | 0.597       | -5.098                               | 0.198       | -6.018                               | 0.787       |
| <i>D</i> -aspartate | -6.096                               | 1.000       | -6.880                                  | 0.940       | -4.596                               | 0.233       | -5.897                               | 0.998       |

**Table S3.** Modified Lorke's method results for the LD<sub>50</sub> estimation of *BZQuin*.

| Modified Lorke's method                                                                                               |                       |        |          |                          |        |
|-----------------------------------------------------------------------------------------------------------------------|-----------------------|--------|----------|--------------------------|--------|
| Diphenylboroxazolidone derived from quinolinate ( <i>BZQuin</i> ) intraperitoneal 0.5 mL injection on male CD-1 mice. |                       |        |          |                          |        |
| Phase I                                                                                                               |                       |        | Phase II |                          |        |
| Group                                                                                                                 | Dose                  | Deaths | Group    | Dose                     | Deaths |
| 1                                                                                                                     | 10 <sup>1</sup> mg/kg | 0/3    | 1        | 10 <sup>2.25</sup> mg/kg | 1/3    |
| 2                                                                                                                     | 10 <sup>2</sup> mg/kg | 0/3    | 2        | 10 <sup>2.50</sup> mg/kg | 3/3    |
| 3                                                                                                                     | 10 <sup>3</sup> mg/kg | 3/3    | 3        | 10 <sup>2.75</sup> mg/kg | 3/3    |

**Table S4.** Least square means and their SEMs per pre-treatment and stimulating agent for global comparisons of locomotor activity.

| Least square means      |                  |
|-------------------------|------------------|
| Pre-treatment           |                  |
| Negative                | 1555.47 ± 104.72 |
| Rlz 10 mg/kg            | 1509.86 ± 104.72 |
| Mem 10 mg/kg            | 1571.20 ± 104.72 |
| Stimulating agent       |                  |
| Quin 300 mg/kg          | 470.50 ± 72.44   |
| <i>BZQuin</i> 593 mg/kg | 1408.79 ± 72.44  |
| <i>BZQuin</i> 100 mg/kg | 2137.41 ± 77.45  |

**Table S5.** Least square means and their SEMs per interaction for simple comparisons of locomotor activity.

| Least square means      |                  |                  |                  |
|-------------------------|------------------|------------------|------------------|
| Stimulating agent       | Pre-treatment    |                  |                  |
|                         | Negative         | Rlz 10 mg/kg     | Mem 10 mg/kg     |
| Quin 300 mg/kg          | 627.12 ± 125.48  | 308.87 ± 125.48  | 475.50 ± 125.48  |
| <i>BZQuin</i> 593 mg/kg | 1662.50 ± 125.48 | 1815 ± 125.48    | 748.87 ± 125.48  |
| <i>BZQuin</i> 100 mg/kg | 1742 ± 134.14    | 1923.87 ± 134.14 | 2746.37 ± 134.14 |

**Table S6.** Medians and the respective percentiles of the pre-treatments and stimulating agents for seizure intensity comparison.

| <b>Pre-treatment</b>     | <b>P<sub>50</sub> (Median)</b> | <b>P<sub>25</sub></b> | <b>P<sub>75</sub></b> |
|--------------------------|--------------------------------|-----------------------|-----------------------|
| Negative                 | 3                              | 2                     | 6.75                  |
| Rlz 10 mg/kg             | 1                              | 0                     | 2                     |
| Mem 10 mg/kg             | 2                              | 0                     | 4                     |
| <b>Stimulating agent</b> | <b>P<sub>50</sub> (Median)</b> | <b>P<sub>25</sub></b> | <b>P<sub>75</sub></b> |
| Quin 300 mg/kg           | 4.50                           | 2.25                  | 6.75                  |
| <i>BZQuin</i> 593 mg/kg  | 2                              | 1                     | 3                     |
| <i>BZQuin</i> 100 mg/kg  | 0                              | 0                     | 2                     |

**Table S7.** Least square means and their SEMs per pretreatment and neurotoxic agent for global comparisons of neuron counts on the four neuroanatomical structures of interest.

| Least square means        |                                         |                                   |                                  |                                    |
|---------------------------|-----------------------------------------|-----------------------------------|----------------------------------|------------------------------------|
| Neuroanatomical structure | Ventral <i>hippocampus</i> (CA1 region) | Basal ganglia ( <i>striatum</i> ) | Brain cortex (prefrontal cortex) | Cerebellum cortex (Purkinje cells) |
| Pre-treatment             |                                         |                                   |                                  |                                    |
| Negative                  | 93.50 ± 2.15                            | 127.40 ± 2.46                     | 109.30 ± 1.88                    | 11.20 ± 0.54                       |
| Rlz 10 mg/kg              | 113.80 ± 2.15                           | 176.10 ± 2.46                     | 136.90 ± 1.88                    | 14 ± 0.54                          |
| Mem 10 mg/kg              | 99.10 ± 2.15                            | 141.40 ± 2.46                     | 103.50 ± 1.88                    | 14.60 ± 0.54                       |
| Stimulating agent         |                                         |                                   |                                  |                                    |
| Quin 300 mg/kg            | 95.86 ± 1.75                            | 152.53 ± 2.01                     | 125 ± 1.54                       | 14.40 ± 0.44                       |
| BZQuin 100 mg/kg          | 108.40 ± 1.75                           | 144.06 ± 2.01                     | 108.13 ± 1.54                    | 12.13 ± 0.44                       |

**Table S8.** Least square means and their SEMs per interaction for simple comparisons of neuron counts on the four neuroanatomical structures of interest.

| Least square means                      |               |               |               |
|-----------------------------------------|---------------|---------------|---------------|
| Ventral <i>hippocampus</i> (CA1 region) |               |               |               |
| Stimulating agent                       | Pre-treatment |               |               |
|                                         | Negative      | Rlz 10 mg/kg  | Mem 10 mg/kg  |
| Quin 300 mg/kg                          | 77.40 ± 3.04  | 117.60 ± 3.04 | 92.60 ± 3.04  |
| BZQuin 100 mg/kg                        | 109.60 ± 3.04 | 110 ± 3.04    | 105.60 ± 3.04 |
| Basal ganglia ( <i>striatum</i> )       |               |               |               |
| Stimulating agent                       | Pre-treatment |               |               |
|                                         | Negative      | Rlz 10 mg/kg  | Negative      |
| Quin 300 mg/kg                          | 144.40 ± 3.48 | 165.40 ± 3.48 | 147.80 ± 3.48 |
| BZQuin 100 mg/kg                        | 110.40 ± 3.48 | 186.80 ± 3.48 | 135 ± 3.48    |
| Brain cortex (prefrontal cortex)        |               |               |               |
| Stimulating agent                       | Pre-treatment |               |               |
|                                         | Negative      | Rlz 10 mg/kg  | Negative      |
| Quin 300 mg/kg                          | 102.60 ± 2.67 | 150.80 ± 2.67 | 121.60 ± 2.67 |
| BZQuin 100 mg/kg                        | 116 ± 2.67    | 123 ± 2.67    | 85.40 ± 2.67  |
| Cerebellum cortex (Purkinje cells)      |               |               |               |
| Stimulating agent                       | Pre-treatment |               |               |
|                                         | Negative      | Rlz 10 mg/kg  | Negative      |
| Quin 300 mg/kg                          | 12.80 ± 0.76  | 13 ± 0.76     | 17.40 ± 0.76  |
| BZQuin 100 mg/kg                        | 9.60 ± 0.76   | 15 ± 0.76     | 11.80 ± 0.76  |

## Spectra:

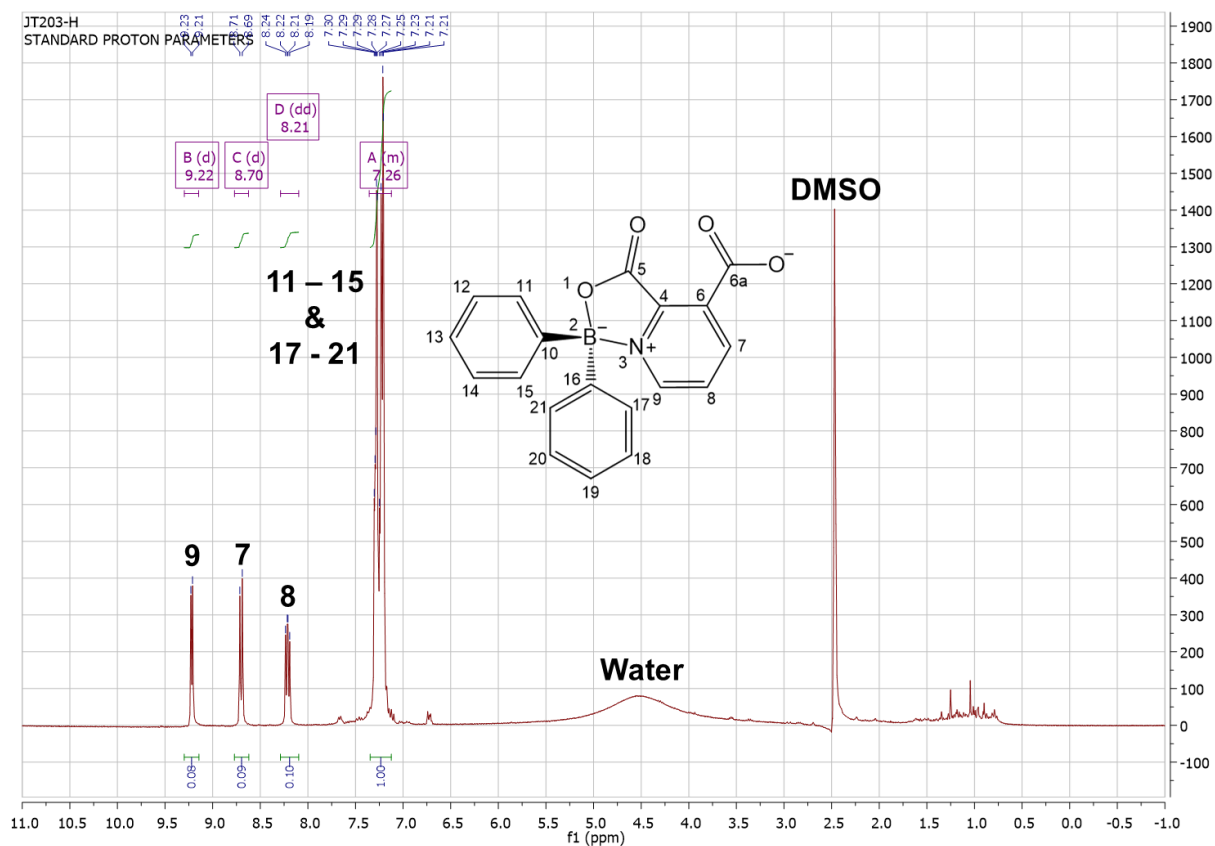

Figure S3.  $^1\text{H}$  NMR spectrum of BZQuin.

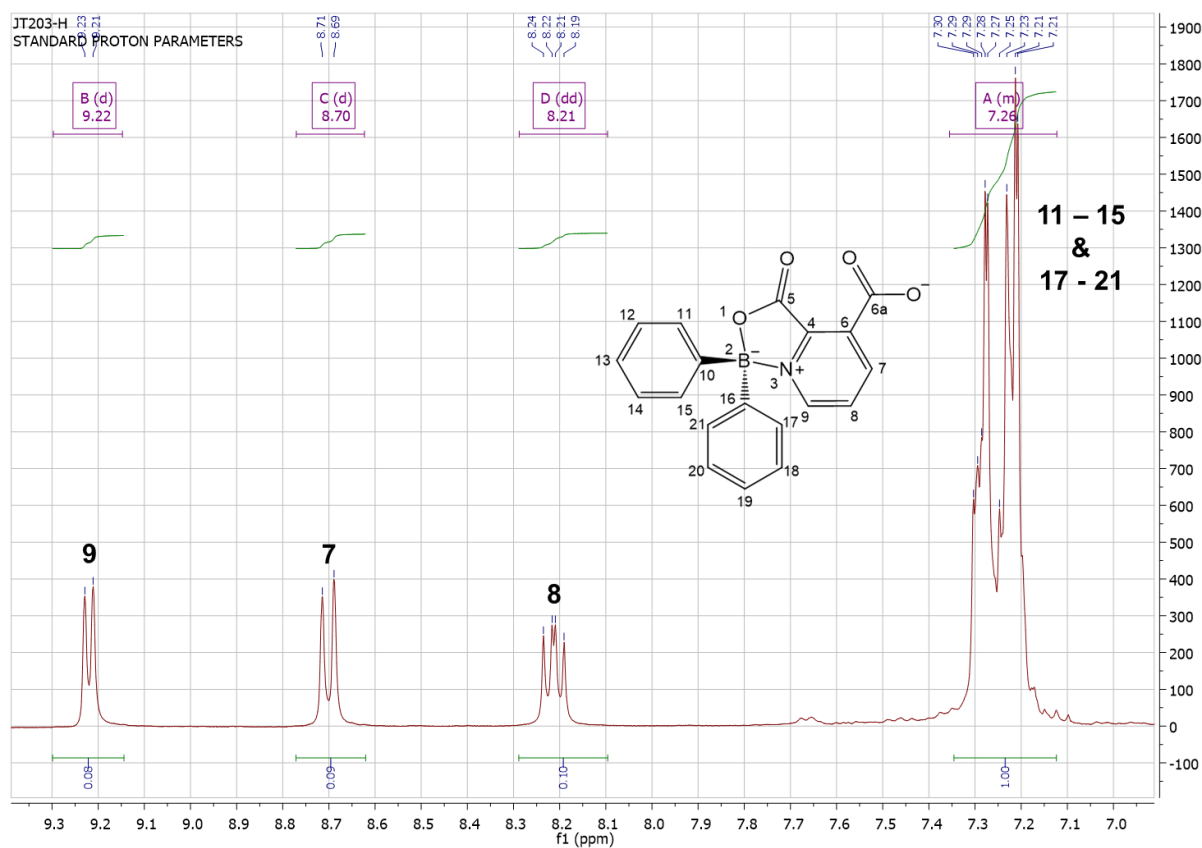

Figure S4. Magnification of the aromatic region of the  $^1\text{H}$  NMR spectrum of BZQuin.

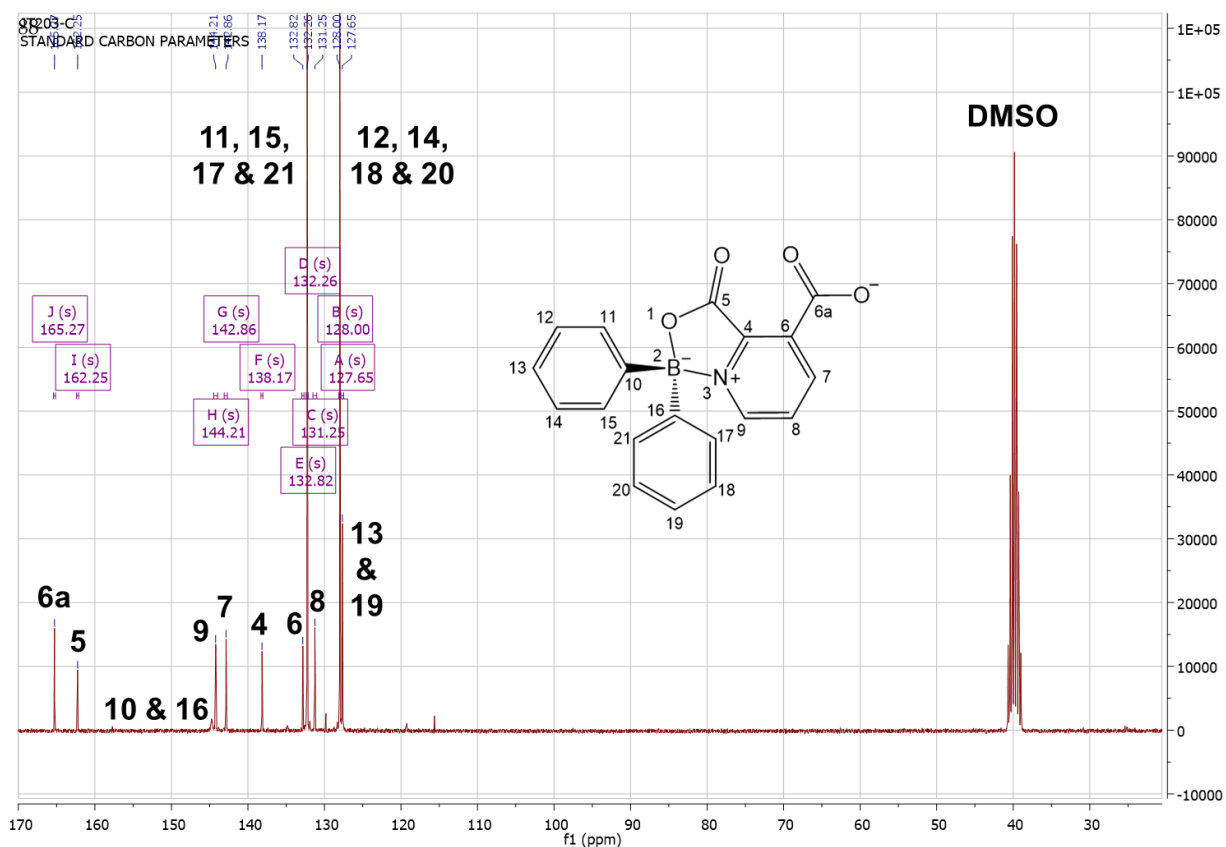

Figure S5.  $^{13}\text{C}$  NMR spectrum of BZQuin.

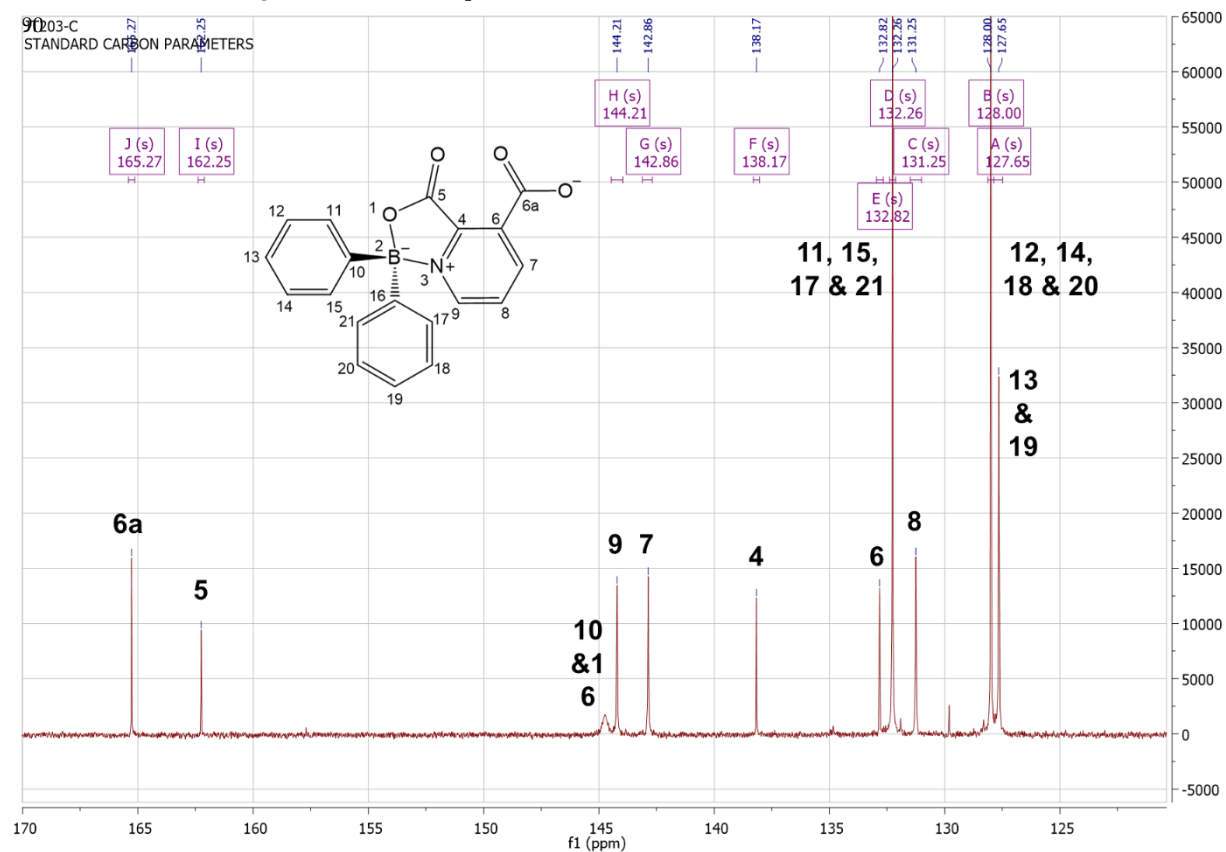

Figure S6. Magnification of the aromatic region of the  $^{13}\text{C}$  NMR spectrum of BZQuin.



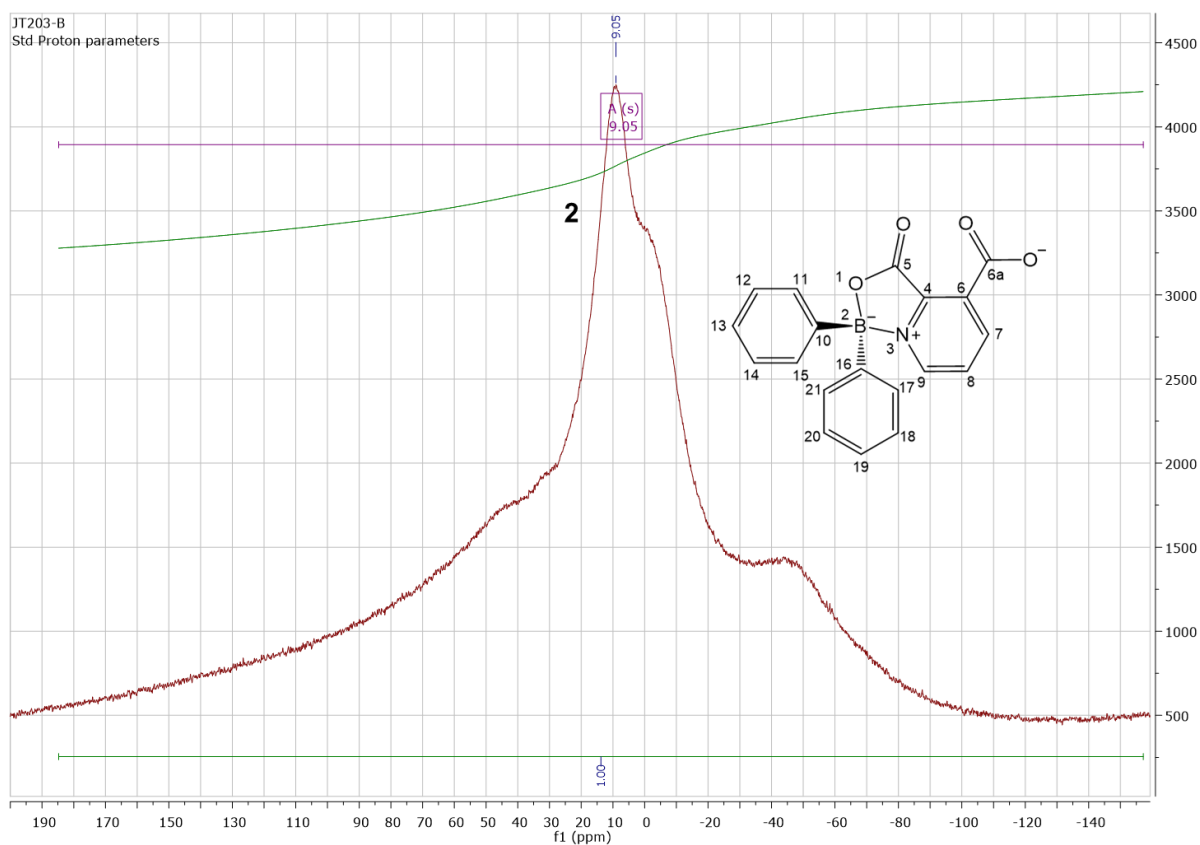

Figure S7.  $^{11}\text{B}$  NMR spectrum of *BZQuin*.

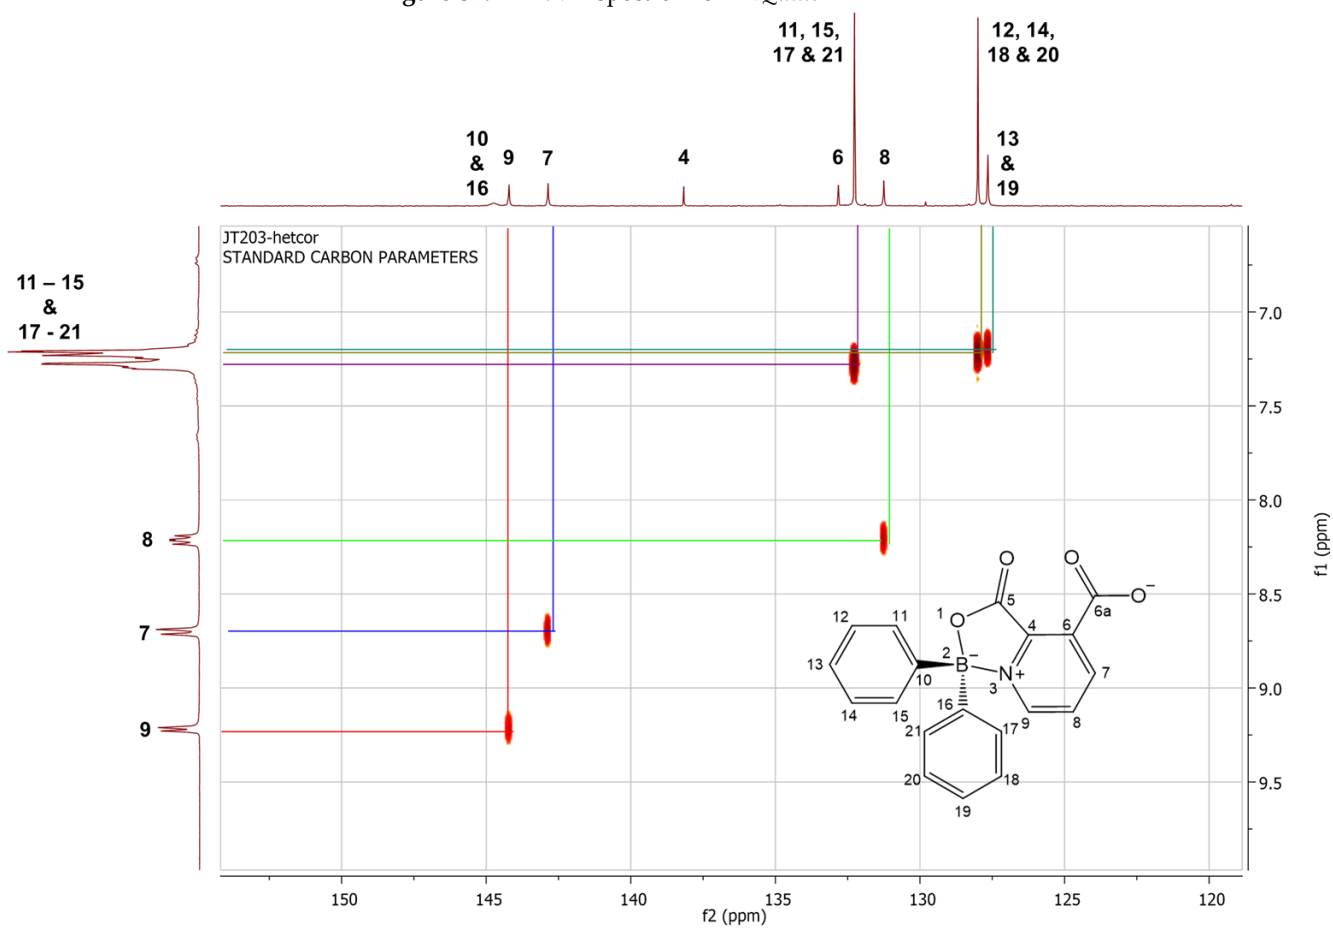

Figure S8. HETCOR 2D NMR experiment for *BZQuin*.

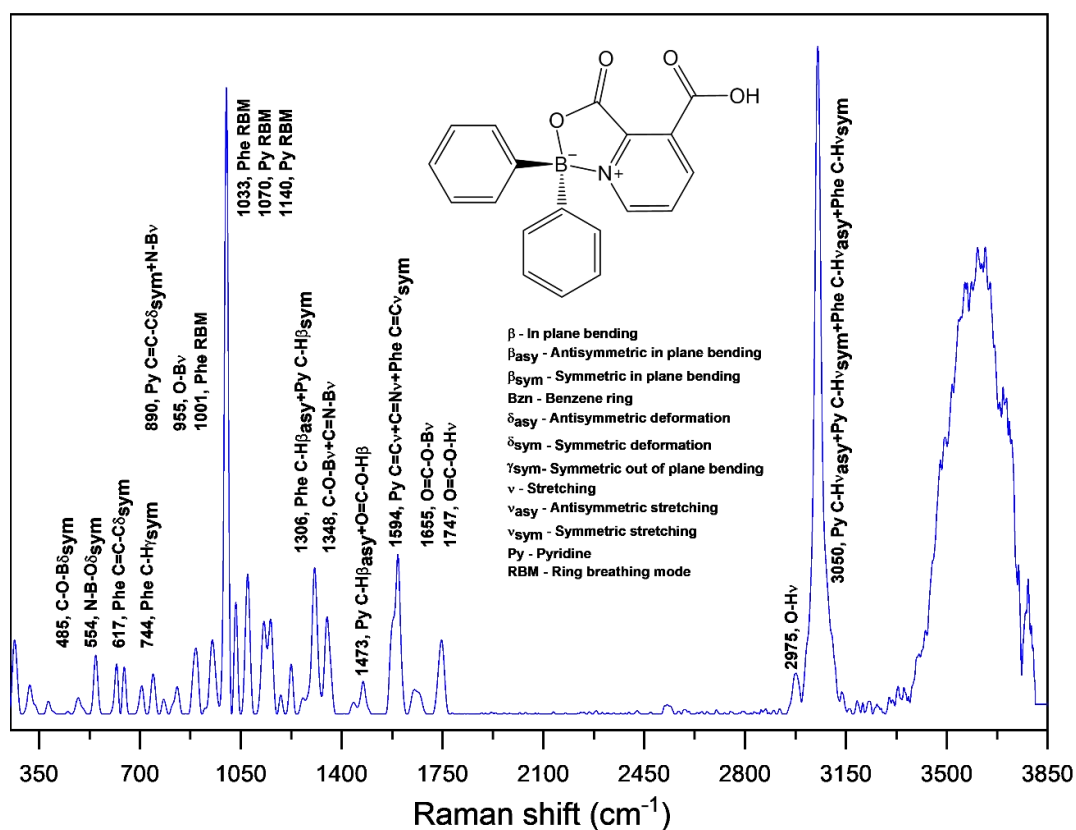

Figure S9. Raman spectrum of BZQuin ( $\lambda_{laser} = 785$  nm at 100 mW).

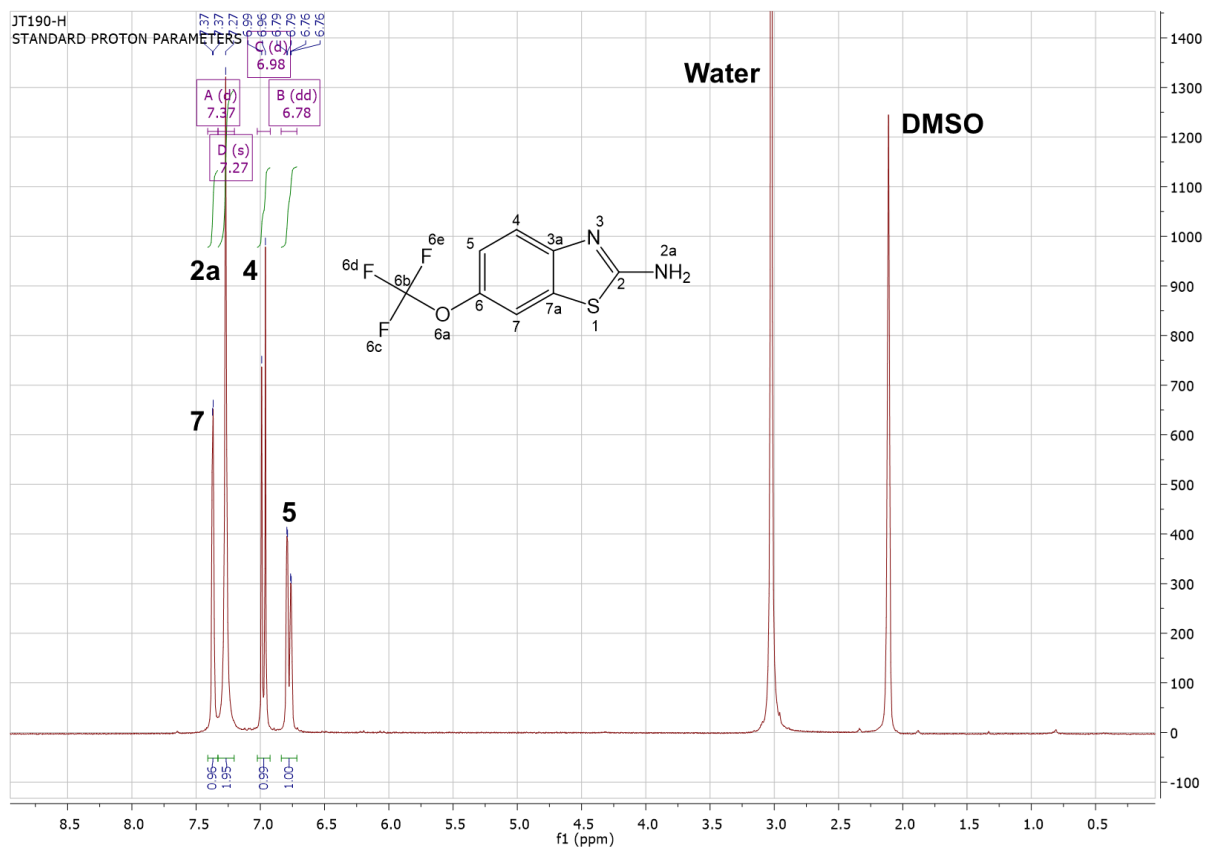

Figure S10. <sup>1</sup>H NMR spectrum of Rlz.

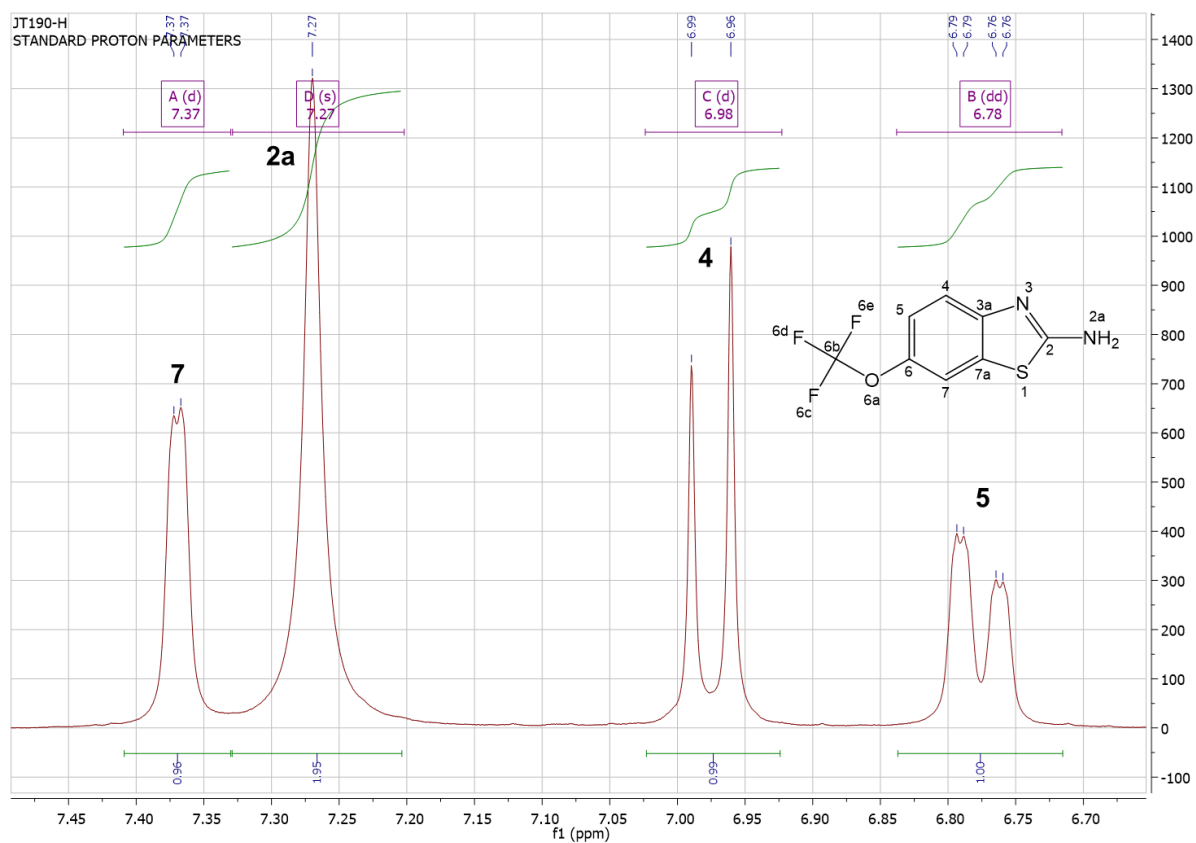

Figure S11. Magnification of the aromatic region of the  $^1\text{H}$  NMR spectrum of Rlz.

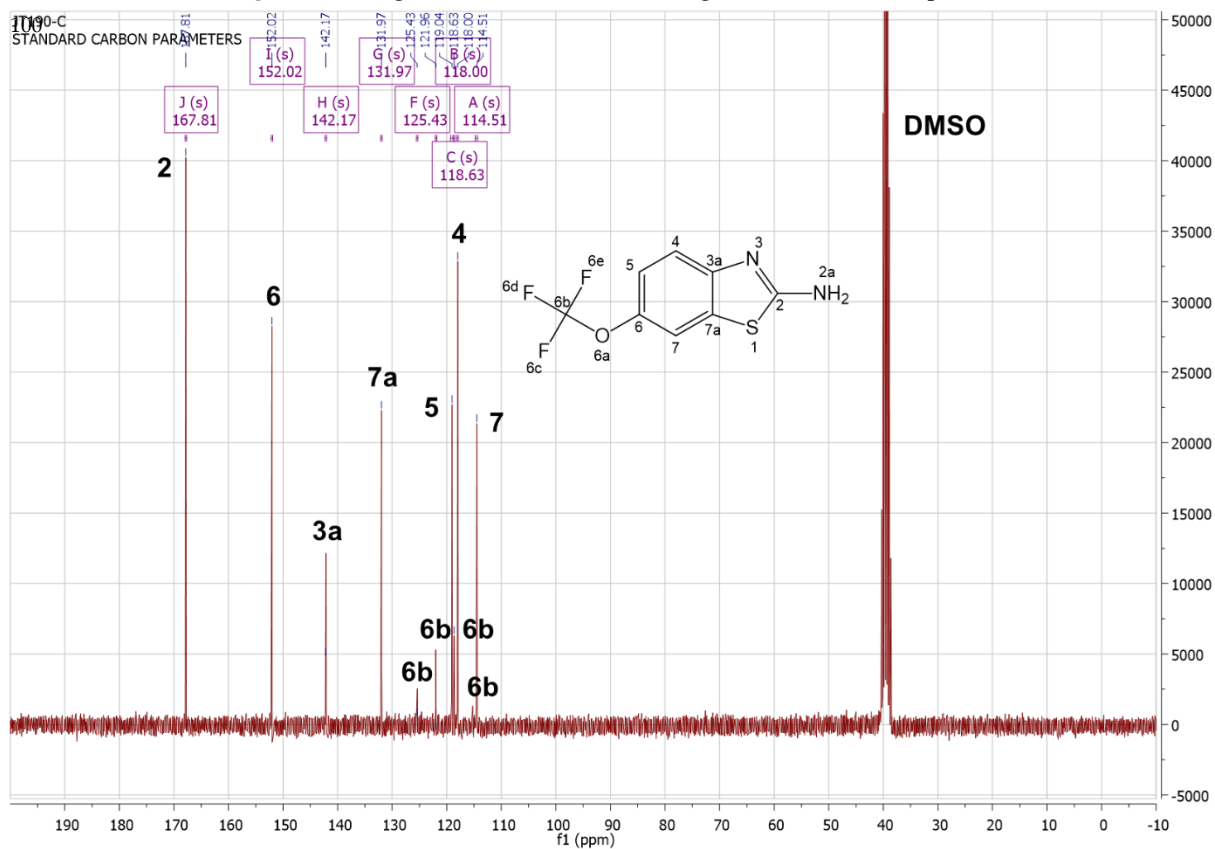

Figure S12.  $^{13}\text{C}$  NMR spectrum of Rlz.

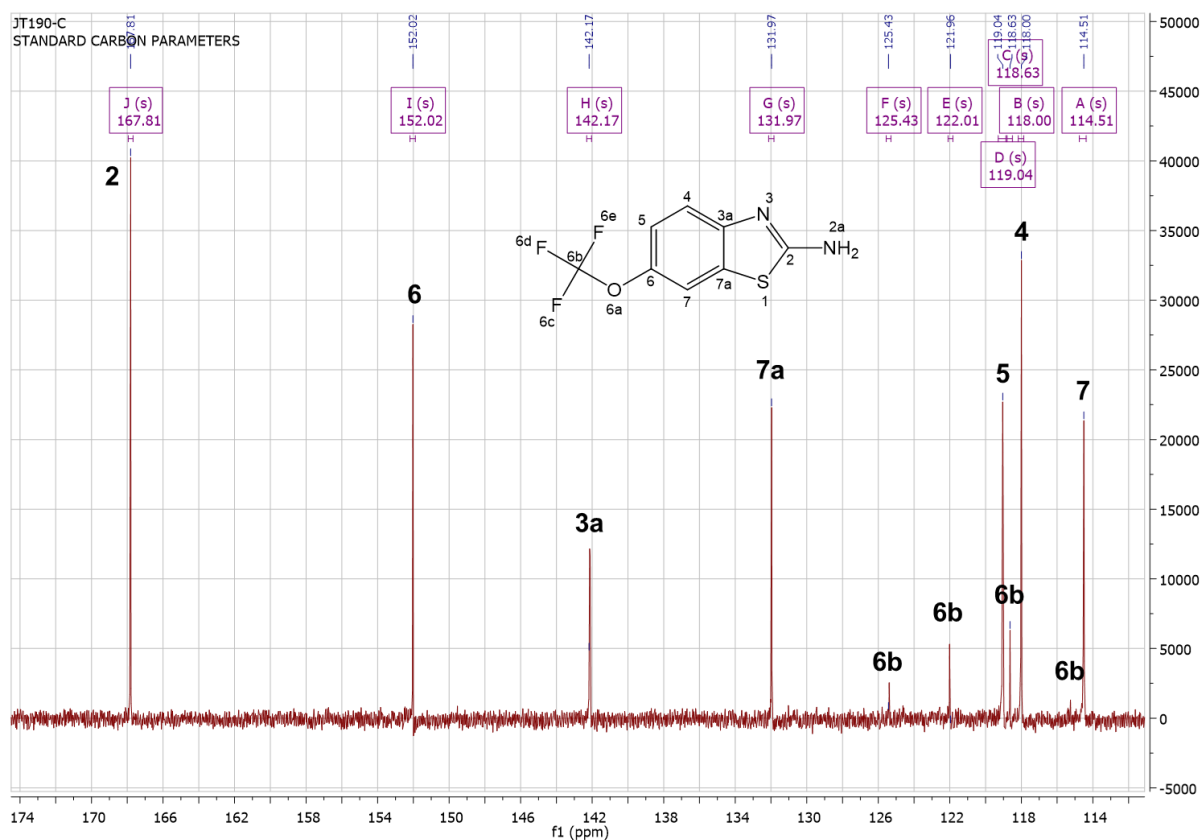

Figure S13. Magnification of the aromatic region of the  $^{13}\text{C}$  NMR spectrum of Rlz.

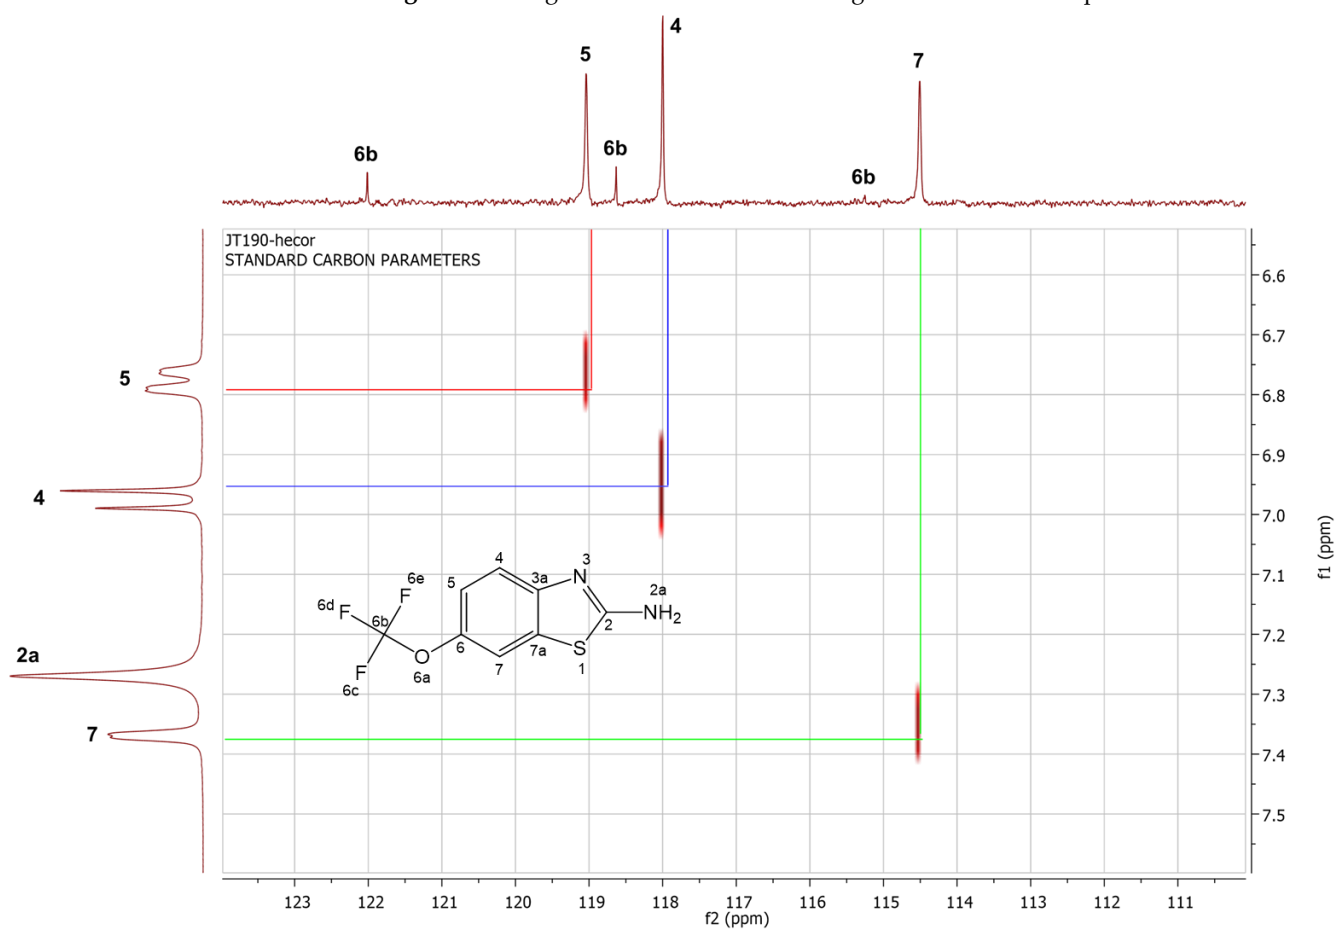

Figure S14. HETCOR 2D NMR experiment for Rlz.

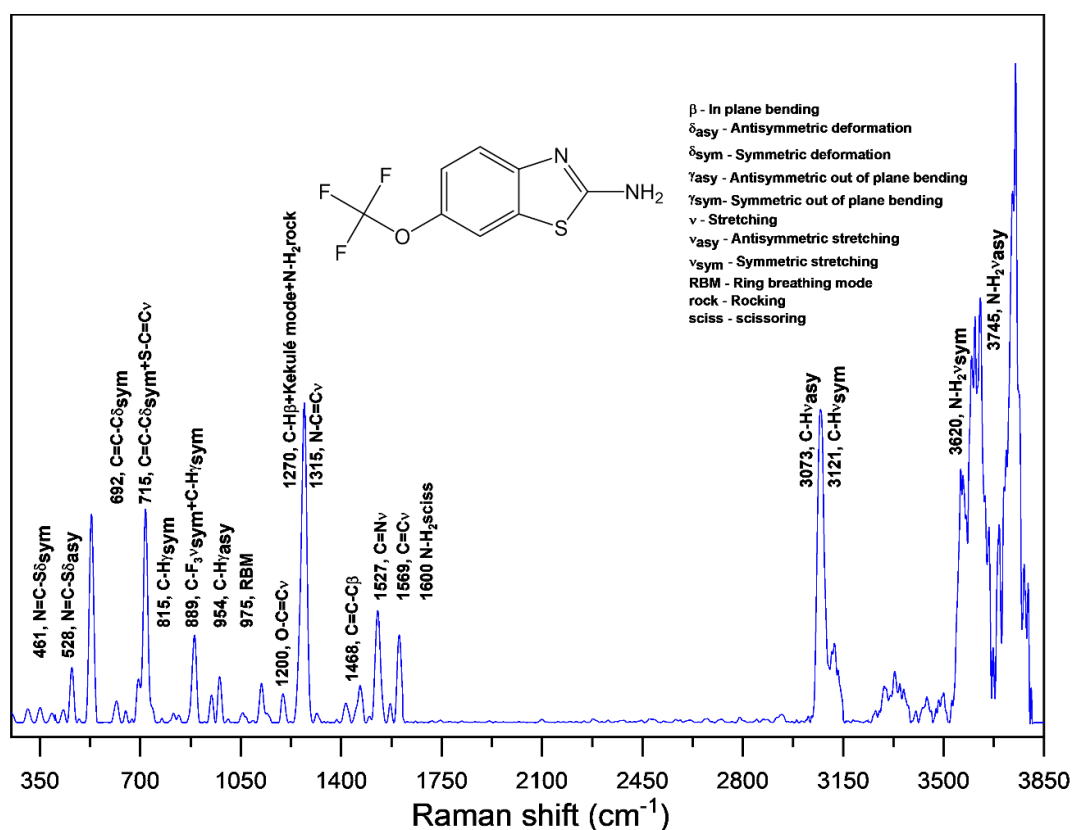

Figure S15. Raman spectrum of Rlz ( $\lambda_{\text{laser}} = 785 \text{ nm}$  at 100 mW).
